# Supplementary material for: Bringing the Heavy Chain to Light: Creating a Symmetric, Bivalent IgG-Like Bispecific
Source: Antibodies (Basel). 2020 Nov 6;9(4):62. doi: 10.3390/antib9040062 (PMC7709125; doi:10.3390/antib9040062)
Supplement: Supplementary file 1 [file antibodies-09-00062-s001.zip › 20200728 Table S1. Crystallographic Statistics.xlsx]

## Sheet: Sheet1
Table S1
Crystallographic data and refinement statistics
	2xVH anti-Lysozyme/Her2 Fab
Diffraction data
PDB Code	7JKB
Wavelength (Å)	0.9795
Unit cell (Å)	70.48 195 91.49
Space group	C 2 2 21
Resolution range (Å) a	48.75 - 2.55 (2.641 - 2.55)
Unique reflextions	20965 (2042)
Data completeness (%)	99.81 (99.80)
Redundancy	6.6 (6.9)
Average I/σ(I)	18.8 (1.8)
CC1/2 (%)	99.9 (71.6)
Rmerge	0.051 (0.959)
Refinement statistics
Reflections in Rfree	2000 (195)
Rwork	0.2542 (0.3507)
Rfree	0.2916 (0.3820)
No. of non-hydrogen atoms
Protein	3337
Solvent	19
B-factors (average)
Protein	81.56
Solvent	67.37
r.m.s.d.
Bond length (Å)	0.005
Bond angle (°)	1.08
Ramachandran plot (%)
Favored	94.16
Allowed	5.62
Outlier	0.22
aValues in parentheses are for the highest-resolution shell.
